# Supplementary material
Source: PubMed Central journal article supplement (PMC2974431)

### A Vehicle

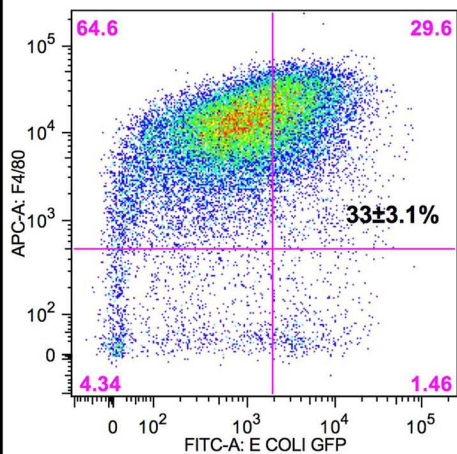

### Isoproterenol (1μM)

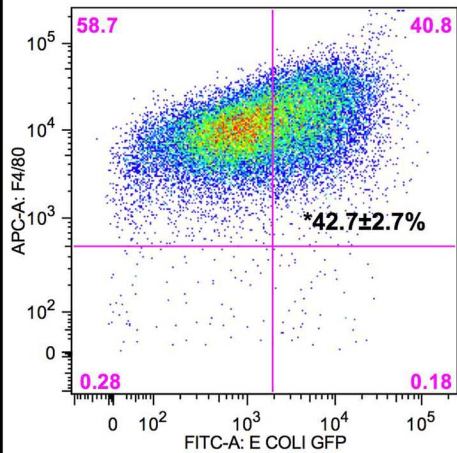

### B

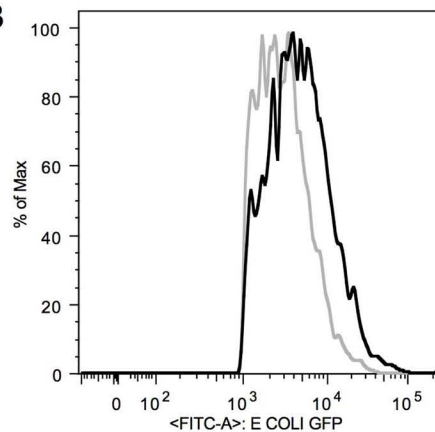

Vehicle, MFI=3400

Isoproterenol, MFI=4500

### D

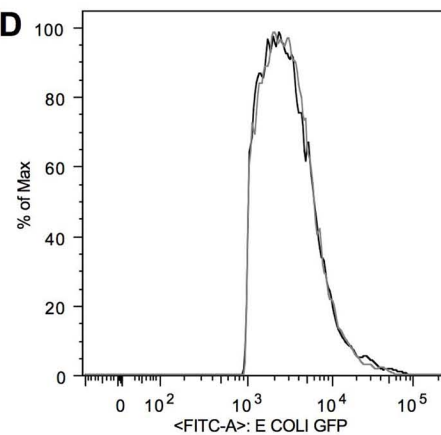

Lysozyme treatment

Lysozyme treatment + Trypan Blue

### C

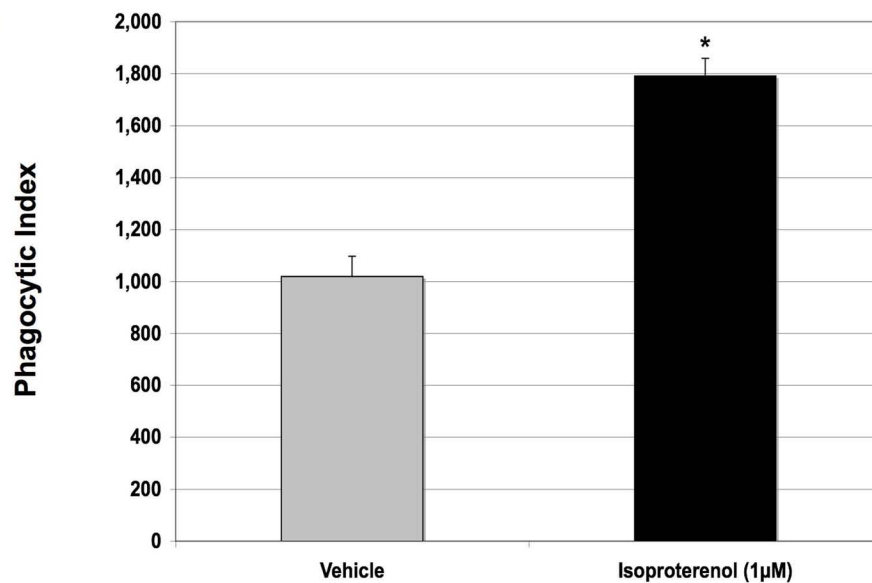

Supplement: supp_jlb.0410186_3AB0410-186_Muthu_suppl_fig_1.pdf [file supp_jlb.0410186_3AB0410-186_Muthu_suppl_fig_1.pdf]
